# Supplementary material for: An Optimized Real-Time qPCR Method for the Effective Detection of Human Malaria Infections
Source: MDPI journal article supplement (doi:10.3390/diagnostics11050736), 2021-04-21

## Supplementary S2

Figure 1 (S2): The product from real-time analytical sensitivity PCR has been subjected to gel electrophoresis for further confirmation. The gel products are from high to low concentration from left to right with 100bp DNA ladders on both sides. The 9<sup>th</sup> and 10<sup>th</sup> dilution shows the absence of products and thus verify the sensitivity of the *Pf* analytical assay up to 0.064 parasite/ $\mu$ L.

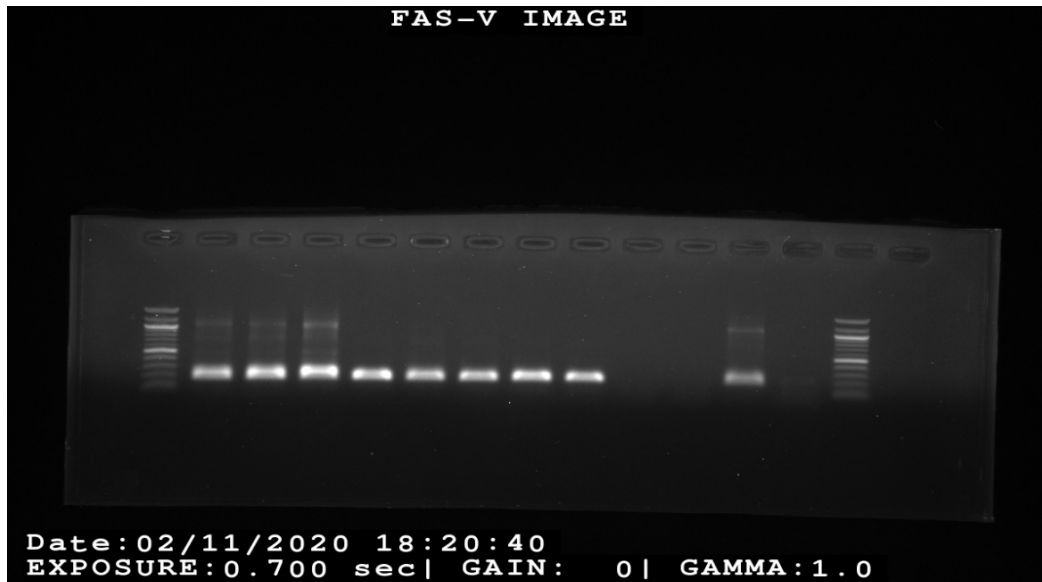

Figure 2 (S2): The product from real-time analytical sensitivity PCR has been subjected to gel electrophoresis for further confirmation. The gel products are from high to low concentration from left to right with 100bp DNA ladders on both sides. The 8<sup>th</sup> dilution shows the absence of products and thus verify the sensitivity of the *Pv* analytical assay up to 1.6 parasites/ $\mu$ L.

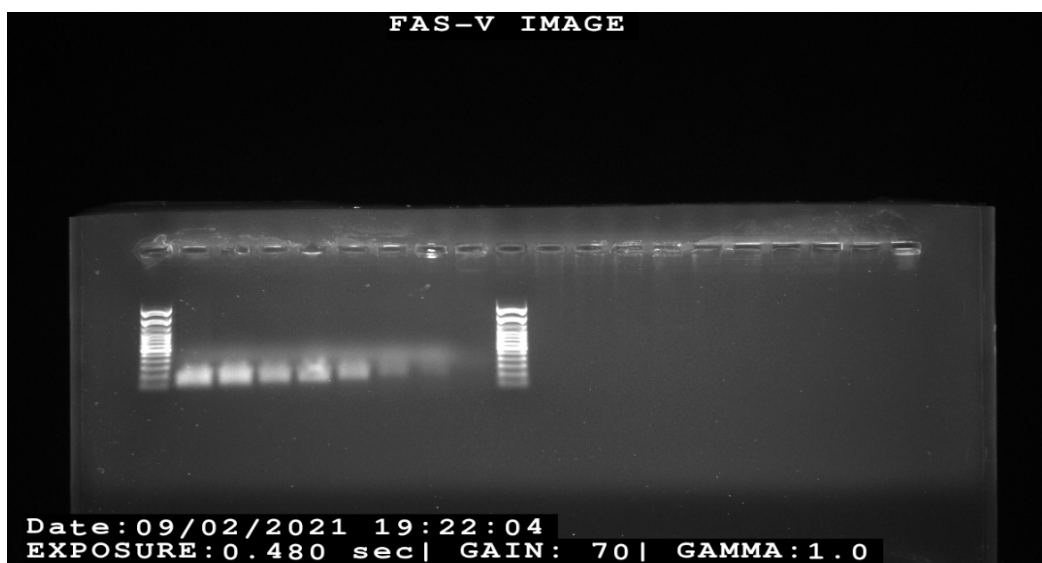

Figure 3 (S2): The product from real-time analytical sensitivity PCR has been subjected to gel electrophoresis for further confirmation. The gel products are from high to low concentration from left to right with 100bp DNA ladders on both sides. The 7<sup>th</sup> dilution shows the absence of products and thus verify the sensitivity of the *Pm* analytical assay up to 0.32 parasites/ $\mu$ L.

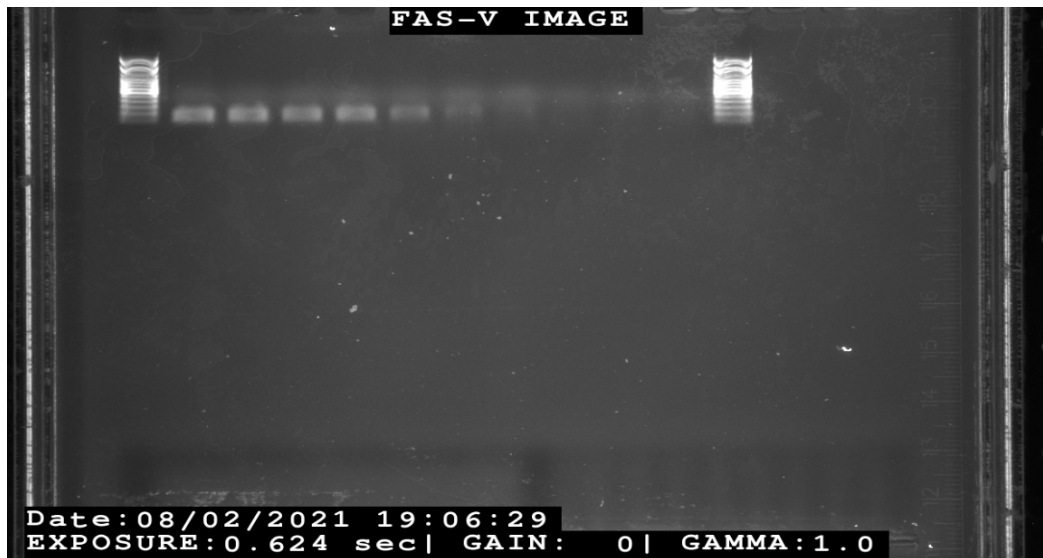

Supplement: s1 [file s1]
